# Supplementary material for: Poly(ethylene oxide)- and Polyzwitterion-Based Thermoplastic Elastomers for Solid Electrolytes
Source: MDPI journal article supplement (doi:10.3390/ma17092145), 2024-05-03
Supplement: s1 [file s1]

## **Supplementary Materials**

### **PEO- and Polyzwitterion-Based Thermoplastic Elastomers for Solid Electrolytes**

**Ding-Li Xia, Shi-Peng Ding, Ze Ye, Chen Yang and Jun-Ting Xu\***

National Key Laboratory of Biobased Transportation Fuel Technology, International Research Center for X Polymers, Department of Polymer Science and Engineering, Zhejiang University, Hangzhou 310058, China

**Table S1.** Detailed information for LiTFSI-doped tri-BCPs.

| Sample                                                                                     | $r^a$ | $M_n^b$ (kg·mol <sup>-1</sup> ) | $\bar{D}^c$ | $f$ (%) of PVPS <sup>d</sup> |
|--------------------------------------------------------------------------------------------|-------|---------------------------------|-------------|------------------------------|
| PVPS <sub>3,1</sub> - <i>b</i> -PEO <sub>210</sub> - <i>b</i> -PVPS <sub>3,1</sub> /LiTFSI | 1/16  | 11400                           | 1.02        | 9.9                          |
|                                                                                            | 1/12  |                                 |             | 9.1                          |
|                                                                                            | 1/6   |                                 |             | 7.1                          |
| PVPS <sub>4,5</sub> - <i>b</i> -PEO <sub>210</sub> - <i>b</i> -PVPS <sub>4,5</sub> /LiTFSI | 1/16  | 12000                           | 1.02        | 13.5                         |
|                                                                                            | 1/12  |                                 |             | 12.5                         |
|                                                                                            | 1/6   |                                 |             | 9.8                          |
| PVPS <sub>6,2</sub> - <i>b</i> -PEO <sub>210</sub> - <i>b</i> -PVPS <sub>6,2</sub> /LiTFSI | 1/16  | 12800                           | 1.02        | 17.9                         |
|                                                                                            | 1/12  |                                 |             | 16.7                         |
|                                                                                            | 1/6   |                                 |             | 13.1                         |
| PVPS <sub>7,4</sub> - <i>b</i> -PEO <sub>210</sub> - <i>b</i> -PVPS <sub>7,4</sub> /LiTFSI | 1/16  | 13300                           | 1.02        | 20.5                         |
|                                                                                            | 1/12  |                                 |             | 19.2                         |
|                                                                                            | 1/6   |                                 |             | 15.1                         |

<sup>a</sup> Doping ratio ( $r$ ) defined according to  $r = [\text{Li}^+]/([\text{EO}]+[\text{VPS}])$ . <sup>b</sup> Number average molecular weight of P4VP-*b*-PEO-*b*-P4VP attained by <sup>1</sup>H-NMR spectra. <sup>c</sup> Polydispersity of P4VP-*b*-PEO-*b*-P4VP,  $\bar{D} = M_w/M_n$  obtained from GPC. <sup>d</sup> Volume fraction of PVPS calculated on the basis of the densities of PEO (1.128 g/cm<sup>3</sup>), PVPS (1.16 g/cm<sup>3</sup>) and LiTFSI (1.334 g/cm<sup>3</sup>)[1, 2], we suppose that lithium salt prefers to enter and complex with the PEO phase.

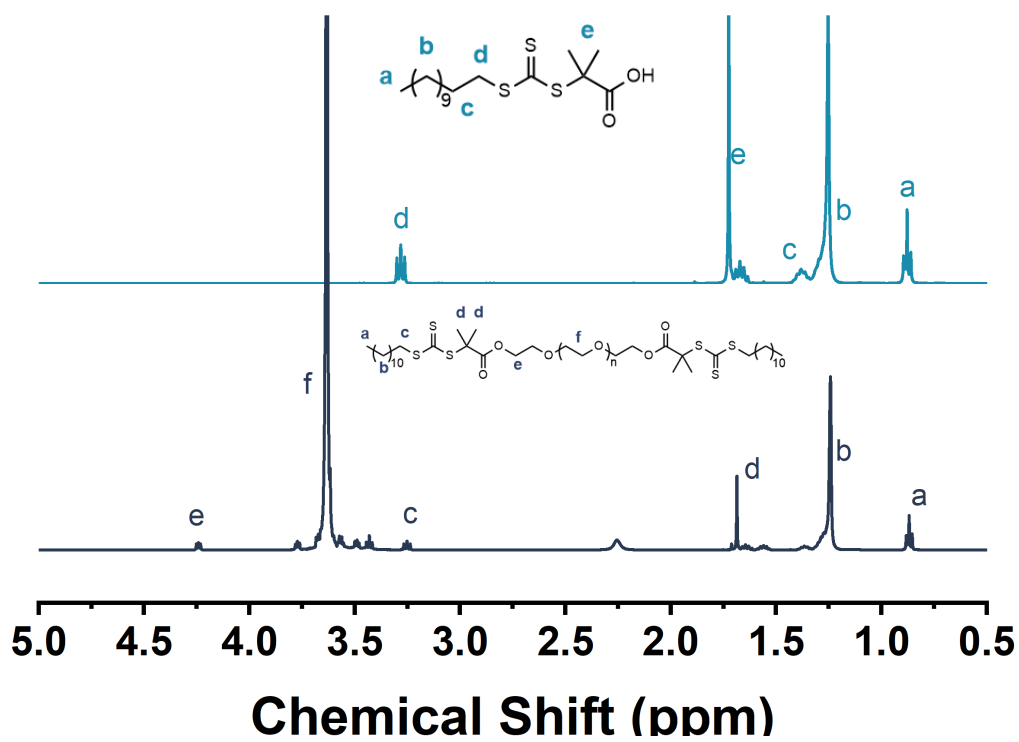

**Figure S1.**  $^1\text{H}$  NMR spectra of TTCA and CTA-PEO-CTA in  $\text{CDCl}_3$ .

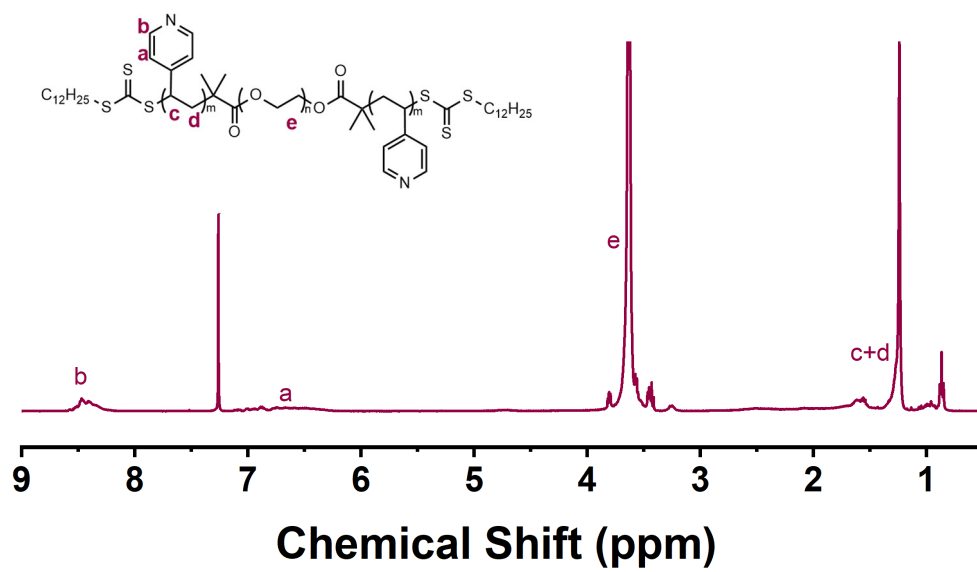

**Figure S2.**  $^1\text{H}$  NMR spectrum of  $\text{P4VP}_{6.2}\text{-}b\text{-PEO-}b\text{-P4VP}_{6.2}$  in  $\text{CDCl}_3$ .

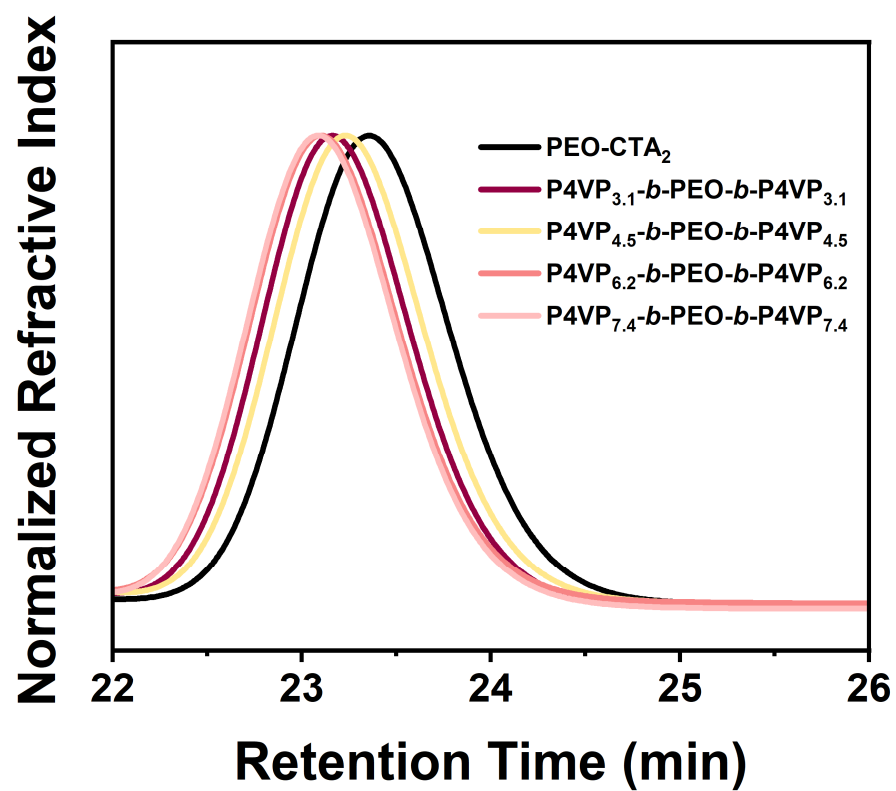

**Figure S3.** GPC traces of CTA-PEO-CTA and P4VP-*b*-PEO-*b*-P4VP tri-BCPs in DMF.

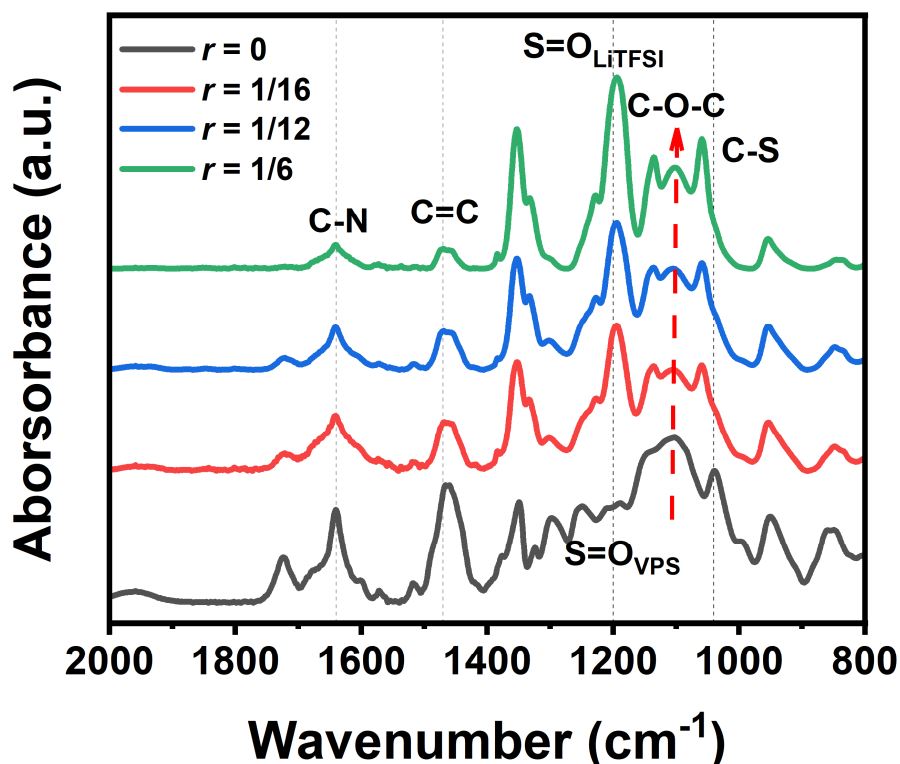

**Figure S4.** FTIR spectra of PVPS<sub>4.5</sub>-*b*-PEO<sub>210</sub>-*b*-PVPS<sub>4.5</sub> tri-BCP and PVPS<sub>4.5</sub>-*b*-PEO<sub>210</sub>-*b*-PVPS<sub>4.5</sub>/LiTFSI hybrids.

We can see from **Figure S4** that, with the increase of salt content, there is no obvious shift of the absorption of C=N bond at 1630 cm<sup>-1</sup> and C=C bond at 1470 cm<sup>-1</sup>. Correspondingly, the shift of the absorption of C-O-C bond from 1110 cm<sup>-1</sup> to 1100 cm<sup>-1</sup> confirms the preferential complexation of Li<sup>+</sup> ion with C-O-C group rather than zwitterionic groups as doping ratio increases.

**Table S2.** Thermal properties of salt-doped PEO and tri-BCPs collected by DSC.

| Sample                                                                             | Doping Ratio ( $r$ ) | Volume Fraction of PVPS | $T_{g, \text{PEO}}$ (°C) | $T_{c, \text{PEO}}$ (°C) | $T_{m, 1, \text{PEO}}$ (°C) | $\Delta H_{m, \text{PEO}}$ (J/g) | $X_{c, \text{PEO}}$ (%) |
|------------------------------------------------------------------------------------|----------------------|-------------------------|--------------------------|--------------------------|-----------------------------|----------------------------------|-------------------------|
| PEO                                                                                | $r = 1/16$           | -                       | -47.3                    | 16.7                     | 40.8                        | 54.2                             | 37.8                    |
|                                                                                    | $r = 1/12$           | -                       | -44.0                    | -6.8                     | -4.1                        | 7.1                              | 5.4                     |
|                                                                                    | $r = 1/6$            | -                       | -38.5                    | -23.7                    | -17.4                       | 2.3                              | 2.4                     |
| PVPS <sub>3,1</sub> - <i>b</i> -PEO <sub>210</sub> - <i>b</i> -PVPS <sub>3,1</sub> | $r = 1/16$           | 0.099                   | -42.9                    | 8.6                      | 32.1                        | 26.7                             | 21.7                    |
|                                                                                    | $r = 1/12$           | 0.091                   | -43.0                    | -6.1                     | -2.3                        | 3.4                              | 3.0                     |
|                                                                                    | $r = 1/6$            | 0.071                   | -36.9                    | -18.4                    | -12.3                       | 2.3                              | 2.7                     |
| PVPS <sub>4,5</sub> - <i>b</i> -PEO <sub>210</sub> - <i>b</i> -PVPS <sub>4,5</sub> | $r = 1/16$           | 0.135                   | -42.9                    | 10.7                     | 31.6                        | 23.7                             | 20.1                    |
|                                                                                    | $r = 1/12$           | 0.125                   | -44.1                    | -6.1                     | -1.5                        | 7.5                              | 6.9                     |
|                                                                                    | $r = 1/6$            | 0.098                   | -37.6                    | -15.9                    | -13.2                       | 2.2                              | 2.6                     |
| PVPS <sub>6,2</sub> - <i>b</i> -PEO <sub>210</sub> - <i>b</i> -PVPS <sub>6,2</sub> | $r = 1/16$           | 0.179                   | -44.5                    | 16.7                     | 35.9                        | 33.1                             | 29.6                    |
|                                                                                    | $r = 1/12$           | 0.167                   | -45.2                    | -7.1                     | -2.1                        | 5.3                              | 5.1                     |
|                                                                                    | $r = 1/6$            | 0.131                   | -36.1                    | -19.7                    | -11.3                       | 1.8                              | 2.3                     |
| PVPS <sub>7,4</sub> - <i>b</i> -PEO <sub>210</sub> - <i>b</i> -PVPS <sub>7,4</sub> | $r = 1/16$           | 0.205                   | -43.2                    | 18.7                     | 35.3                        | 31.8                             | 29.4                    |
|                                                                                    | $r = 1/12$           | 0.192                   | -40.4                    | 9.0                      | 30.4                        | 20.2                             | 20.1                    |
|                                                                                    | $r = 1/6$            | 0.151                   | -32.2                    | -17.4                    | -8.2                        | 1.9                              | 2.4                     |

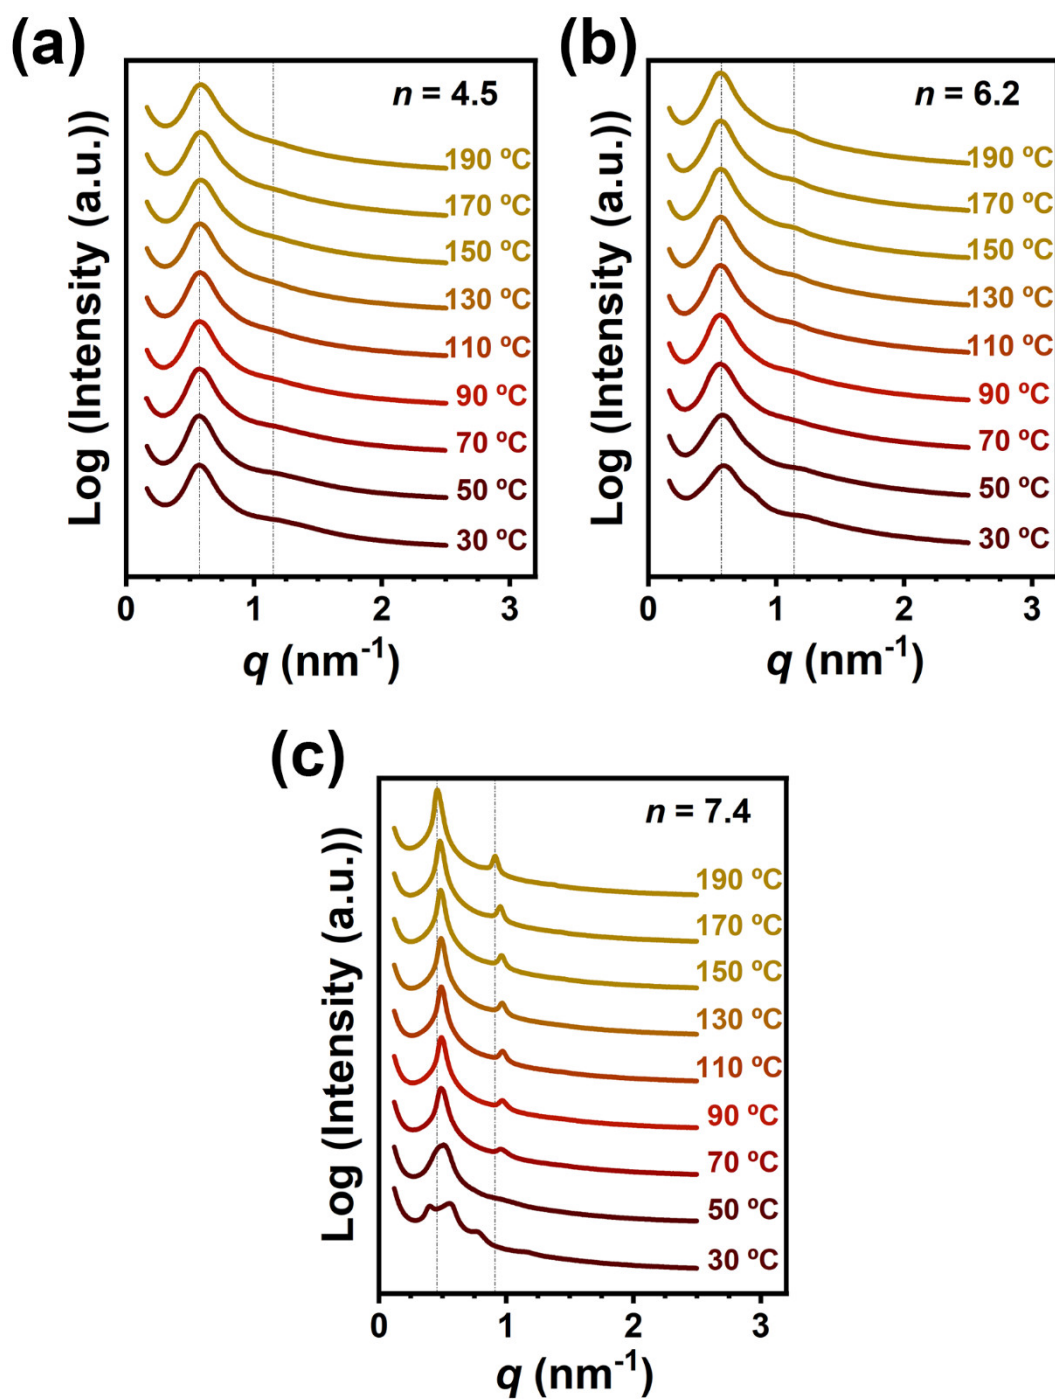

**Figure S5.** Temperature-variable SAXS profiles of PVPS<sub>n</sub>-*b*-PEO<sub>210</sub>-*b*-PVPS<sub>n</sub>/LiTFSI hybrids with  $r = 1/16$  from 30 °C to 200 °C. (a)  $n = 4.5$ , (b)  $n = 6.2$ , (c)  $n = 7.4$ .



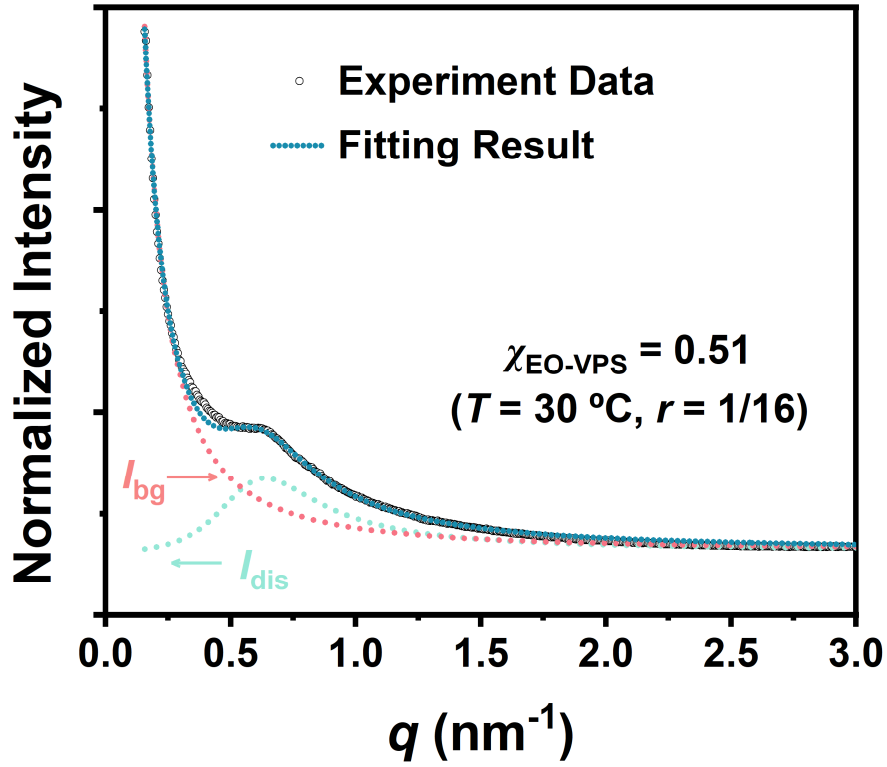

**Figure S6.** Fitting result for PVPS<sub>3.1</sub>-*b*-PEO<sub>210</sub>-*b*-PVPS<sub>3.1</sub>/LiTFSI hybrid with  $r = 1/16$  at 30 °C.

According to Ref. 5, for PS-*b*-PEO/LiTFSI hybrids with molecular weight around 10 kg mol<sup>-1</sup>, at doping ratio of 1/16 and 30 °C, the increase in  $\chi_{\text{eff}}$  with  $r$  can be described by following equation

$$\chi_{\text{eff}} = A(T) + \frac{B(T)}{N} + \frac{C(T)}{N} \left[ 1 - \exp \left( \frac{-D(T)r}{N} \right) \right] \quad (\text{S1})$$

where  $A(T) = 10.2 \times T^{-1}$ ,  $B(T) = 1.85 \times 10^3 \times T^{-1}$ ,  $C(T) = 1.01 \times 10^{-2} \times T$  and  $D(T) = 22.4 \times T$ .  $M_{\text{PS}}$  and  $M_{\text{PEO}}$  are set as 4.9 and 5.5 kg mol<sup>-1</sup>, respectively, so that  $N$  is equals to 96.[3-5]

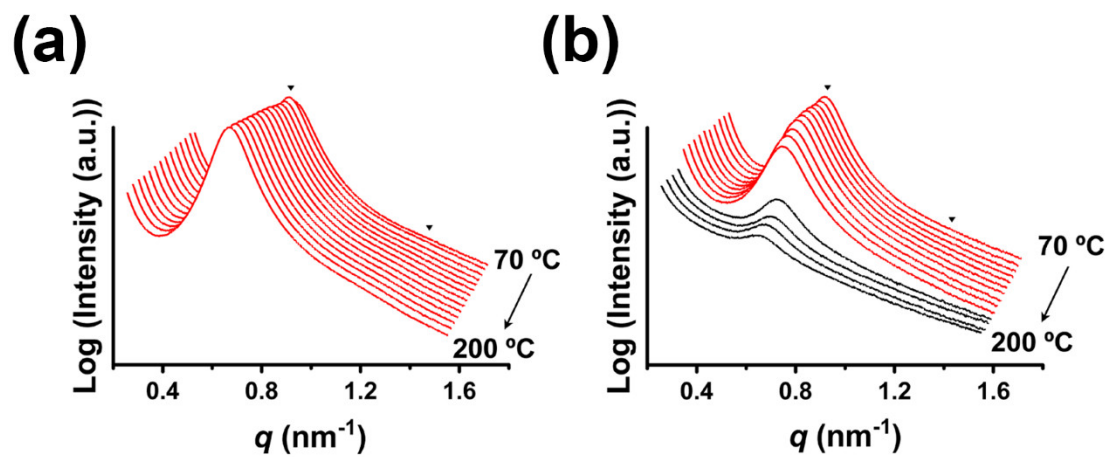

**Figure S7.** Temperature-variable SAXS profiles of (a) PVPS<sub>4.5</sub>-*b*-PEO<sub>210</sub>-*b*-PVPS<sub>4.5</sub>/LiTFSI with  $r = 1/12$  and (b) PVPS<sub>4.5</sub>-*b*-PEO<sub>210</sub>-*b*-PVPS<sub>4.5</sub>/LiTFSI with  $r = 1/6$ .

**Table S3.** Microphase separation morphology and grain size for PEO/LiTFSI and PVPS-*b*-PEO-*b*-PVPS/LiTFSI hybrids.

| Sample                                                                   | $r$  | Ionic Conductivity<br>(S/cm) at 30°C | Grain Size<br>(nm) | Morphology |
|--------------------------------------------------------------------------|------|--------------------------------------|--------------------|------------|
| PEO <sub>210</sub> /LiTFSI                                               | 1/16 | $4.35 \times 10^{-5}$                | -                  | -          |
|                                                                          | 1/12 | $4.63 \times 10^{-5}$                | -                  | -          |
|                                                                          | 1/6  | $2.16 \times 10^{-5}$                | -                  | -          |
| PVPS <sub>3.1</sub> -PEO <sub>210</sub> -<br>PVPS <sub>3.1</sub> /LiTFSI | 1/16 | $7.33 \times 10^{-5}$                | 9.7                | dis        |
|                                                                          | 1/12 | $6.17 \times 10^{-5}$                | -                  | homo       |
|                                                                          | 1/6  | $1.77 \times 10^{-5}$                | -                  | homo       |
| PVPS <sub>4.5</sub> -PEO <sub>210</sub> -<br>PVPS <sub>4.5</sub> /LiTFSI | 1/16 | $5.30 \times 10^{-5}$                | 32.0               | LAM        |
|                                                                          | 1/12 | $4.03 \times 10^{-5}$                | 29.8               | LAM        |
|                                                                          | 1/6  | $1.94 \times 10^{-5}$                | 31.4               | LAM → dis  |
| PVPS <sub>6.2</sub> -PEO <sub>210</sub> -<br>PVPS <sub>6.2</sub> /LiTFSI | 1/16 | $6.08 \times 10^{-6}$                | 27.1               | LAM        |
|                                                                          | 1/12 | $1.09 \times 10^{-5}$                | 38.5               | LAM        |
|                                                                          | 1/6  | $3.97 \times 10^{-5}$                | 34.0               | LAM        |
| PVPS <sub>7.4</sub> -PEO <sub>210</sub> -<br>PVPS <sub>7.4</sub> /LiTFSI | 1/16 | $3.53 \times 10^{-6}$                | 23.1               | LAM        |
|                                                                          | 1/12 | $8.79 \times 10^{-6}$                | 74.6               | LAM        |
|                                                                          | 1/6  | $3.29 \times 10^{-5}$                | 68.6               | LAM        |

Grain size ( $L$ ) can be calculated by Scherrer equation[6, 7]

$$L = 2\pi K(\text{FWHM})^{-1} \quad (\text{S2})$$

where  $K$  is a constant taking the value of 0.93. FWHM represents the half-peak width of the primary scattering peak in the SAXS patterns.

**Table S4.** Apparent activation energy ( $E_a$ ) for ion transport for PEO/LiTFSI and PVPS-*b*-PEO-*b*-PVPS/LiTFSI hybrids.

| Sample                                                               | Doping ratio ( $r$ ) | $E_a$ (kJ mol <sup>-1</sup> ) |
|----------------------------------------------------------------------|----------------------|-------------------------------|
| PEO <sub>210</sub> /LiTFSI                                           | 1/16                 | 7.7                           |
|                                                                      | 1/12                 | 8.2                           |
|                                                                      | 1/6                  | 9.6                           |
| PVPS <sub>3.1</sub> -PEO <sub>210</sub> -PVPS <sub>3.1</sub> /LiTFSI | 1/16                 | 7.4                           |
|                                                                      | 1/12                 | 7.8                           |
|                                                                      | 1/6                  | 9.5                           |
| PVPS <sub>4.5</sub> -PEO <sub>210</sub> -PVPS <sub>4.5</sub> /LiTFSI | 1/16                 | 7.2                           |
|                                                                      | 1/12                 | 8.2                           |
|                                                                      | 1/6                  | 9.2                           |
| PVPS <sub>6.2</sub> -PEO <sub>210</sub> -PVPS <sub>6.2</sub> /LiTFSI | 1/16                 | 11.2                          |
|                                                                      | 1/12                 | 10.5                          |
|                                                                      | 1/6                  | 8.5                           |
| PVPS <sub>7.4</sub> -PEO <sub>210</sub> -PVPS <sub>7.4</sub> /LiTFSI | 1/16                 | 8.4                           |
|                                                                      | 1/12                 | 10.8                          |
|                                                                      | 1/6                  | 7.8                           |

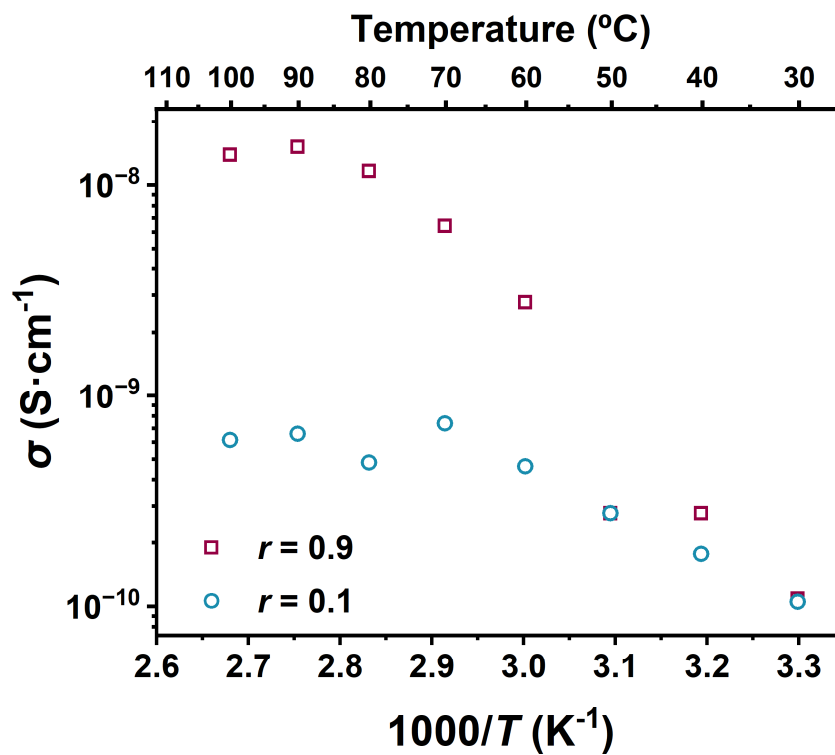

**Figure S8.** Ionic conductivities of PVPS<sub>5.8</sub>/LiTFSI blends at different doping ratios,  $r=0.1$  and  $r=0.9$ .

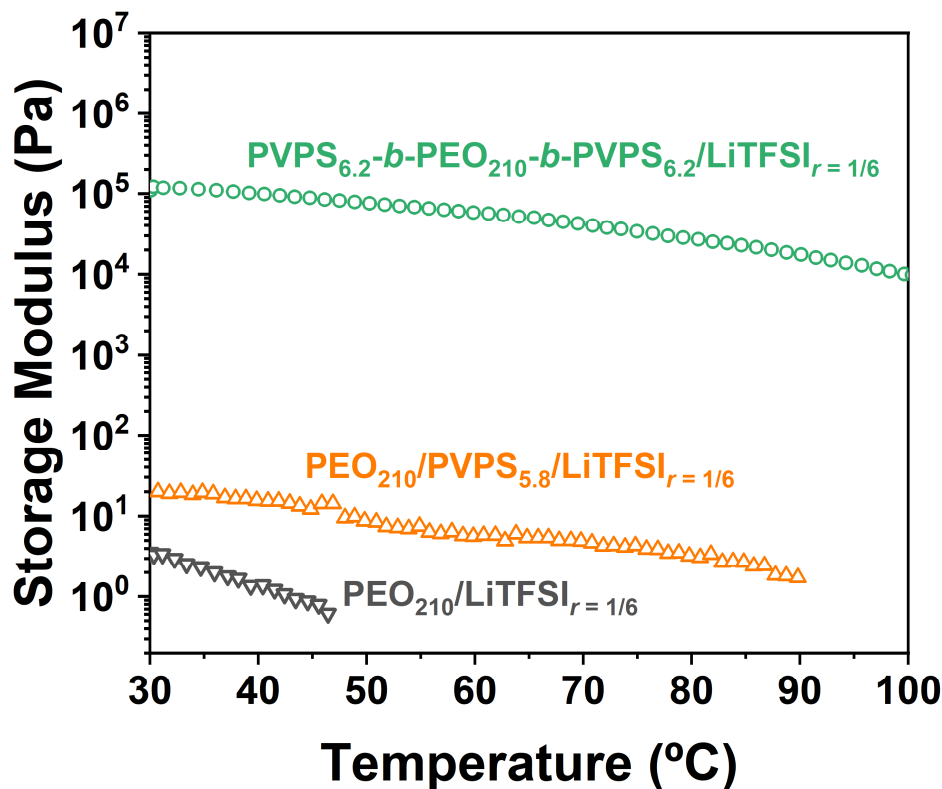

**Figure S9.** Storage moduli of PEO<sub>210</sub>/LiTFSI hybrids, PEO<sub>210</sub>/PVPS<sub>5.8</sub>/LiTFSI blends and PVPS<sub>6.2</sub>-*b*-PEO<sub>210</sub>-*b*-PVPS<sub>6.2</sub>/LiTFSI at  $r = 1/6$ .

Employing a methodology akin to that used for PEO/LiTFSI electrolytes, we formulated PEO/PVPS/LiTFSI electrolyte. We incorporated LiTFSI in a quantitative manner, adhering to the molar ratio of LiTFSI to the total repeating units of PEO and PVPS. The weight fraction of PVPS in the PEO/PVPS/LiTFSI hybrid was 0.124, consistent with that in the tri-BCP counterpart. We subsequently assessed the rheological properties of these composites, the results of which are delineated subsequently in **Figure S9**.

The robust intra- and intermolecular interactions confer PVPS a glassy state at ambient temperature, thereby establishing it as a physical crosslinking site within the blend. Consequently, despite the blend retaining a viscoelastic liquid-like character, the modulus experiences an approximate tenfold increase against PEO/LiTFSI electrolyte. However, the mechanical reinforcement imparted by the PVPS in the blend is still significantly inferior to that achieved by PVPS in the corresponding tri-

BCP as PEO and PVPS are chemically bonded to each other in the tri-BCP, leading to the formation of lamellar structures as a result of microphase separation.

**Table S5.** Ionic conductivity and storage modulus compared to other block copolymer electrolytes around room temperature.[8-14]

| Electrolyte <sup>a</sup>                                                                   | $\sigma$ (S/cm)                 | $G'$ (Pa)                 | Ref.  |
|--------------------------------------------------------------------------------------------|---------------------------------|---------------------------|-------|
| PVPS <sub>3.1</sub> - <i>b</i> -PEO <sub>210</sub> - <i>b</i> -PVPS <sub>3.1</sub> /LiTFSI | $7.3 \times 10^{-5}$ (30 °C)    | $2.9 \times 10^3$ (30 °C) | -     |
| PVPS <sub>6.2</sub> - <i>b</i> -PEO <sub>210</sub> - <i>b</i> -PVPS <sub>6.2</sub> /LiTFSI | $3.9 \times 10^{-5}$ (30 °C)    | $1.1 \times 10^5$ (30 °C) | -     |
| PEO/LiTFSI                                                                                 | $\sim 1 \times 10^{-7}$ (30 °C) | $1 \times 10^6$ (30 °C)   | 8     |
| PS- <i>b</i> -PEO/LiTFSI                                                                   | $1.2 \times 10^{-5}$ (30 °C)    | $1 \times 10^7$ (30 °C)   | 9, 10 |
| PS- <i>b</i> -POEGMA/LiClO <sub>4</sub>                                                    | $1 \times 10^{-5}$ (30 °C)      | $2 \times 10^4$ (25 °C)   | 11    |
| gPS- <i>b</i> -gPEO- <i>b</i> -gPS/LiTFSI                                                  | $2 \times 10^{-5}$ (25 °C)      | $3 \times 10^4$ (45 °C)   | 12    |
| PPMTC- <i>b</i> -PEO/LiTFSI                                                                | $2 \times 10^{-4}$ (30 °C)      | $3 \times 10^1$ (30 °C)   | 13    |
| PC- <i>b</i> -PEO- <i>b</i> -PC <sup>b</sup> /LiTFSI                                       | $6.7 \times 10^{-4}$ (30 °C)    | $5.2 \times 10^5$ (30 °C) | 14    |

<sup>a</sup> Salt content varies; parameters reported for electrolytes at their optimized salt ratio for ionic conductivity. <sup>b</sup> PC represents a kind of CO<sub>2</sub>-derived polycarbonate, poly(4-vinyl cyclohexene oxide carbonate).



## Reference

1. Timachova, K.; Villaluenga, I.; Cirrincione, L.; Gobet, M.; Bhattacharya, R.; Jiang, X.; Newman, J.; Madsen, L.A.; Greenbaum, S.G.; Balsara, N.P. Anisotropic Ion Diffusion and Electrochemically Driven Transport in Nanostructured Block Copolymer Electrolytes. *J. Phys. Chem. B* **2018**, *122*, 1537-1544.
2. Ding, S.P.; Zhang, Z.K.; Ye, Z.; Du, B.Y.; Xu, J.T. Fabrication of High  $\chi$ -Low  $N$  Block Copolymers with Thermally Stable Sub-5 nm Microdomains Using Polyzwitterion as a Constituent Block. *ACS Macro Lett.* **2021**, *10*, 1321-1325.
3. Wang, R.Y.; Zhang, Z.K.; Guo, X.S.; Cao, X.H.; Zhang, T.Y.; Tong, Z.Z.; Xu, J.T.; Du, B.Y.; Fan, Z.Q. Mechanistic Study of the Influence of Salt Species on the Lower Disorder-to-Order Transition Behavior of Poly(Ethylene Oxide)-*b*-Poly(Ionic Liquid)/Salt Hybrids. *Macromolecules* **2020**, *53*, 4560-4567.
4. Chintapalli, M.; Timachova, K.; Olson, K.R.; Mecham, S.J.; Desimone, J.M.; Balsara, N.P. Lithium Salt Distribution and Thermodynamics in Electrolytes Based on Short Perfluoropolyether-*block*-Poly(Ethylene Oxide) Copolymers. *Macromolecules* **2020**, *53*, 1142-1153.
5. Teran, A.A.; Balsara, N.P. Thermodynamics of Block Copolymers with and without Salt. *J. Phys. Chem. B* **2014**, *118*, 4-17.
6. Chintapalli, M.; Chen, X.C.; Thelen, J.L.; Teran, A.A.; Wang, X.; Garetz, B.A.; Balsara, N.P. Effect of Grain Size on the Ionic Conductivity of a Block Copolymer Electrolyte. *Macromolecules* **2014**, *47*, 5424-5431.
7. Grundy, L.S.; Fu, S.; Galluzzo, M.D.; Balsara, N.P. The Effect of Annealing on the Grain Structure and Ionic Conductivity of Block Copolymer Electrolytes. *Macromolecules* **2022**, *55*, 10294-10301.
8. Pesko, D.M.; Webb, M.A.; Jung, Y.K.; Zheng, Q.; Miller, T.F.; Iii; Coates, G.W.; Balsara, N.P. Universal Relationship between Conductivity and Solvation-Site Connectivity in Ether-Based Polymer Electrolytes. *Macromolecules* **2016**, *49*, 5244-5255.
9. Bouchet, R.; Phan, T.N.T.; Beaudoin, E.; Devaux, D.; Davidson, P.; Bertin, D.; Denoyel, R. Charge Transport in Nanostructured PS-PEO-PS Triblock Copolymer Electrolytes. *Macromolecules* **2014**, *47*, 2659-2665.
10. Singh, M.; Odusanya, O.; Wilmes, G.M.; Eitouni, H.B.; Gomez, E.D.; Patel, A.J.; Chen, V.L.; Park, M.J.; Fragouli, P.; Iatrou, H.; Hadjichristidis, N.; Cookson, D.; Balsara, N.P. Effect of Molecular Weight on the Mechanical and Electrical Properties of Block Copolymer Electrolytes. *Macromolecules* **2007**, *40*, 4578-4585.
11. Rolland, J.; Brassinne, J.; Bourgeois, J.P.; Poggi, E.; Vlad, A.; Gohy, J.F. Chemically Anchored Liquid-Peo Based Block Copolymer Electrolytes for Solid-State Lithium-Ion Batteries. *J. Mater. Chem. A* **2014**, *2*, 11839-11846.
12. Bates, C.M.; Chang, A.B.; Momcilovic, N.; Jones, S.C.; Grubbs, R.H. ABA Triblock Brush Polymers: Synthesis, Self-Assembly, Conductivity, and Rheological Properties. *Macromolecules* **2015**, *48*, 4967-4973.
13. Cao, X.H.; Li, J.H.; Yang, M.J.; Yang, J.L.; Wang, R.Y.; Zhang, X.H.; Xu, J.T. Simultaneous Improvement of Ionic Conductivity and Mechanical Strength in

Block Copolymer Electrolytes with Double Conductive Nanophases. *Macromol. Rapid Commun.* **2020**, *41*, 1900622.

14. Gregory, G.L.; Gao, H.; Liu, B.; Gao, X.; Rees, G.J.; Pasta, M.; Bruce, P.G.; Williams, C.K. Buffering Volume Change in Solid-State Battery Composite Cathodes with CO<sub>2</sub>-Derived Block Polycarbonate Ethers. *J. Am. Chem. Soc.* **2022**, *144*, 17477-17486.
